# Supplementary material
Source: PubMed Central journal article supplement (PMC3304673)
Supplement: 594056.f1.pdf [file 594056.f1.pdf]

**Supplemental Table 1.** Gene sets enriched in SLE patients with risk haplotypes. Gene sets with an FDR of <25% are not included in this table, instead are presented in the main body. Gene sets with nominal P values <0.01 are included.

| NAME                                  | SIZE | NES     | NOM p-val | FDR q-val | FWER p-val | RANK AT MAX |
|---------------------------------------|------|---------|-----------|-----------|------------|-------------|
| HSC_INTERMEDIATEPROGENITORS_FETAL     | 149  | -1.6999 | <0.001    | 0.253795  | 0.84       | 3179        |
| HSA00052_GALACTOSE_METABOLISM         | 32   | -       | 0.002     | 0.305292  | 0.968      | 2123        |
|                                       |      | 1.61557 |           |           |            |             |
| REFRACTORY_GASTRIC_UP                 | 80   | -       | 0.002092  | 0.345095  | 0.994      | 4300        |
|                                       |      | 1.52912 |           |           |            |             |
| ZHAN_MULTIPLE_MYELOMA_SUBCLASSES_DIFF | 28   | -       | 0.003937  | 0.308918  | 0.941      | 1744        |
|                                       |      | 1.64872 |           |           |            |             |
| TOLLPATHWAY                           | 32   | -       | 0.003945  | 0.348624  | 0.961      | 2274        |
|                                       |      | 1.62693 |           |           |            |             |
| HSC_INTERMEDIATEPROGENITORS_SHARED    | 123  | -       | 0.008     | 0.359105  | 0.986      | 3179        |
|                                       |      | 1.57143 |           |           |            |             |
| AGUIRRE_PANCREAS_CHR22                | 54   | -       | 0.00818   | 0.361323  | 0.982      | 4004        |
|                                       |      | 1.59091 |           |           |            |             |

**Supplemental table 2:** Gene sets enriched in controls with risk haplotypes. Gene sets with an FDR of <25% are not included in this table, instead are presented in the main body. Gene sets with nominal P values <0.01 are included.

| NAME                        | SIZE | NES      | NOM p-val | FDR q-val | FWER p-val | RANK AT MAX |
|-----------------------------|------|----------|-----------|-----------|------------|-------------|
| GERY_CEBP_TARGETS           | 109  | -1.81319 | <0.001    | 0.275938  | 0.488      | 3221        |
| V\$AP1_Q2_01                | 243  | -1.43992 | <0.001    | 0.347928  | 1          | 2732        |
| V\$AP1_Q6                   | 228  | -1.48634 | <0.001    | 0.373109  | 1          | 2835        |
| LEE_MYC_E2F1_UP             | 54   | -1.84568 | <0.001    | 0.435867  | 0.373      | 4284        |
| STAEGE_EFTS_UP              | 29   | -1.56459 | 0.001942  | 0.315071  | 0.992      | 3743        |
| BRG1_ALAB_UP                | 38   | -1.70861 | 0.003717  | 0.257094  | 0.821      | 4685        |
| CIS_XPC_UP                  | 144  | -1.60351 | 0.003745  | 0.274163  | 0.977      | 4561        |
| AGED_MOUSE_CEREBELLUM_UP    | 58   | -1.63976 | 0.004016  | 0.267618  | 0.938      | 1894        |
| V\$CP2_02                   | 204  | -1.34375 | 0.005484  | 0.426902  | 1          | 4937        |
| CIS_RESIST_GASTRIC_UP       | 15   | -1.65266 | 0.00565   | 0.259019  | 0.92       | 2363        |
| LEE_ACOX1_UP                | 63   | -1.62756 | 0.005747  | 0.265578  | 0.955      | 2861        |
| LEE_MYC_TGFA_UP             | 58   | -1.61086 | 0.005747  | 0.284531  | 0.972      | 2861        |
| NI2_MOUSE_UP                | 39   | -1.82372 | 0.006135  | 0.397077  | 0.448      | 2833        |
| UVB_NHEK1_UP                | 171  | -1.67952 | 0.007435  | 0.280447  | 0.873      | 3450        |
| ADIP_DIFF_CLUSTERS5         | 37   | -1.70904 | 0.007463  | 0.269807  | 0.821      | 3467        |
| BUT_TSA_UP                  | 18   | -1.70194 | 0.007874  | 0.262453  | 0.826      | 2471        |
| HDACI_COLON_CLUSTER9        | 60   | -1.66699 | 0.008114  | 0.254092  | 0.9        | 3132        |
| ET743_HELA_UP               | 53   | -1.67516 | 0.009488  | 0.261475  | 0.882      | 3090        |
| STRIATED_MUSCLE_CONTRACTION | 34   | -1.68601 | 0.009634  | 0.271933  | 0.858      | 6386        |

**Supplemental Table 3:** Gene sets enriched in SLE patients with non-risk IRF 5 haplotypes compared to patients with the Risk haplotype. Gene sets with a nominal p value of less than 0.01 are included.

| NAME                                                | SIZE | ES       | NES      | NOM p-val | FDR q-val | FWER p-val | RANK AT MAX |
|-----------------------------------------------------|------|----------|----------|-----------|-----------|------------|-------------|
| CSKPATHWAY                                          | 21   | 0.666287 | 1.870454 | 0         | 0.407342  | 0.273      | 3742        |
| TENEDINI_MEGAKARYOCYTIC_GENES                       | 54   | 0.511938 | 1.786157 | 0         | 0.425361  | 0.617      | 3338        |
| V\$AP1_Q2                                           | 239  | 0.328148 | 1.41691  | 0         | 0.456004  | 1          | 3572        |
| V\$AP1FJ_Q2                                         | 244  | 0.337882 | 1.48669  | 0         | 0.471216  | 1          | 3305        |
| SMOOTH_MUSCLE_CONTRACTION                           | 146  | 0.372629 | 1.545349 | 0         | 0.474066  | 0.999      | 3988        |
| AMIPATHWAY                                          | 21   | 0.666287 | 1.870454 | 0         | 0.814685  | 0.273      | 3742        |
| HSA04630_JAK_STAT_SIGNALING_PATHWAY                 | 151  | 0.325419 | 1.464096 | 0.001767  | 0.461325  | 1          | 5371        |
| CCAWN/WWNNNGGC_UNKNOWN                              | 69   | 0.402963 | 1.542663 | 0.001818  | 0.470765  | 0.999      | 1526        |
| CHIARETTI_T_ALL_DIFF                                | 253  | 0.449471 | 1.736445 | 0.001832  | 0.571742  | 0.798      | 4613        |
| CHIARETTI_T_ALL                                     | 233  | 0.455962 | 1.724574 | 0.001835  | 0.578779  | 0.829      | 4613        |
| HSA05131_PATHOGENIC_ESCHERICHIA_COLI_INFECTION_EPEC | 44   | 0.484547 | 1.639318 | 0.001855  | 0.399826  | 0.958      | 1754        |
| HSA05130_PATHOGENIC_ESCHERICHIA_COLI_INFECTION_EHEC | 44   | 0.484547 | 1.639318 | 0.001855  | 0.413153  | 0.958      | 1754        |
| HSA05210_COLORECTAL_CANCER                          | 83   | 0.381618 | 1.530341 | 0.001873  | 0.45464   | 1          | 4458        |
| WNT_SIGNALING                                       | 61   | 0.435306 | 1.638039 | 0.00188   | 0.392309  | 0.958      | 4323        |
| SPRYPATHWAY                                         | 18   | 0.525617 | 1.689199 | 0.003617  | 0.463204  | 0.902      | 2119        |
| AGED_MOUSE_NEOCORTEX_UP                             | 65   | 0.407376 | 1.626143 | 0.00367   | 0.389216  | 0.969      | 2531        |
| MENSE_HYPOXIA_UP                                    | 100  | 0.489513 | 1.801542 | 0.003711  | 0.538363  | 0.547      | 4161        |
| HYPOXIA_REVIEW                                      | 80   | 0.41852  | 1.612287 | 0.003759  | 0.402516  | 0.979      | 5326        |
| UVC_HIGH_D2_DN                                      | 35   | 0.594234 | 1.700157 | 0.003861  | 0.507861  | 0.883      | 3022        |
| LINDSTEDT_DEND_UP                                   | 49   | 0.468639 | 1.646219 | 0.005245  | 0.480557  | 0.951      | 5503        |
| V\$NFY_01                                           | 211  | 0.283507 | 1.34383  | 0.005415  | 0.43691   | 1          | 4613        |
| CTATGCA,MIR-153                                     | 208  | 0.359483 | 1.504467 | 0.005464  | 0.460001  | 1          | 5005        |
| TAVOR_CEBP_UP                                       | 49   | 0.456658 | 1.699041 | 0.005484  | 0.47757   | 0.886      | 2284        |
| ZHAN_MM_CD138_MS_VS_REST                            | 41   | 0.55605  | 1.704728 | 0.005556  | 0.573807  | 0.877      | 3113        |
| CMV_HCMV_TIMECOURSE_20HRS_DN                        | 38   | 0.552308 | 1.817208 | 0.005556  | 0.58786   | 0.48       | 3627        |
| TTANWNANTGGM_UNKNOWN                                | 49   | 0.474865 | 1.681922 | 0.005629  | 0.468083  | 0.911      | 5856        |
| IGF1_NIH3T3_UP                                      | 35   | 0.559457 | 1.674902 | 0.005671  | 0.449658  | 0.921      | 5211        |
| V\$AML1_Q6                                          | 211  | 0.302969 | 1.373787 | 0.00692   | 0.440082  | 1          | 4134        |
| V\$AML1_01                                          | 211  | 0.302969 | 1.373787 | 0.00692   | 0.441801  | 1          | 4134        |
| KIM_TH_CELLS_DN                                     | 16   | 0.722009 | 1.614114 | 0.007105  | 0.405474  | 0.978      | 3383        |
| CALCIUM_REGULATION_IN_CARDIAC_CELLS                 | 139  | 0.365563 | 1.528075 | 0.007299  | 0.445209  | 1          | 3824        |
| GLEEVECPATHWAY                                      | 21   | 0.500399 | 1.645783 | 0.007313  | 0.463973  | 0.952      | 4323        |
| IL6PATHWAY                                          | 21   | 0.491444 | 1.642442 | 0.007519  | 0.427253  | 0.958      | 2155        |
| PARK_HSC_VS_MPP_DN                                  | 15   | 0.668124 | 1.738739 | 0.007547  | 0.636853  | 0.79       | 2447        |
| IRITANI_ADPROX_UP                                   | 25   | 0.554791 | 1.706344 | 0.007561  | 0.6189    | 0.87       | 1488        |
| VERNELL_PRB_CLSTR2                                  | 20   | 0.57965  | 1.674946 | 0.007752  | 0.474329  | 0.921      | 2071        |
| V\$FXR_IR1_Q6                                       | 99   | 0.355864 | 1.475467 | 0.008681  | 0.478204  | 1          | 4613        |
| UVC_HIGH_D9_DN                                      | 24   | 0.584352 | 1.790693 | 0.009452  | 0.483812  | 0.596      | 2758        |
| TGF_BETA_SIGNALING_PATHWAY                          | 50   | 0.502144 | 1.623769 | 0.00994   | 0.389268  | 0.975      | 4552        |

**Supplemental Table 4:** Gene sets enriched in controls with non-risk haplotypes compared to controls with risk haplotypes. Gene sets with a nominal p value of less than 0.01 are included.

| NAME                                                       | SIZE | ES       | NES      | NOM p-val | FDR q-val | FWER p-val | RANK AT MAX |
|------------------------------------------------------------|------|----------|----------|-----------|-----------|------------|-------------|
| V\$AR_Q6                                                   | 206  | 0.340263 | 1.508151 | 0         | 0.318034  | 1          | 3688        |
| CACTGCC,MIR-34A,MIR-34C,MIR-449                            | 260  | 0.270111 | 1.34264  | 0         | 0.436335  | 1          | 2304        |
| AGTCAGC,MIR-345                                            | 57   | 0.554175 | 1.863005 | 0         | 0.495772  | 0.294      | 3241        |
| UV-CMV_UNIQUE_HCMV_6HRS_DN                                 | 78   | 0.399057 | 1.717096 | 0         | 0.50321   | 0.775      | 3301        |
| NICK_RHAPC_UP                                              | 32   | 0.62646  | 1.893779 | 0         | 0.650289  | 0.225      | 3652        |
| GTACAGG,MIR-486                                            | 55   | 0.444743 | 1.742531 | 0         | 0.793029  | 0.696      | 2389        |
| GTAAACC,MIR-299-5P                                         | 51   | 0.474455 | 1.722654 | 0.001988  | 0.598143  | 0.755      | 2843        |
| AATGGAG,MIR-136                                            | 75   | 0.417531 | 1.607454 | 0.002033  | 0.396443  | 0.963      | 3204        |
| HDACI_COLON_CLUSTER6                                       | 41   | 0.484505 | 1.749171 | 0.00207   | 0.920742  | 0.669      | 2981        |
| V\$NFY_Q6                                                  | 220  | 0.268103 | 1.37565  | 0.002088  | 0.409294  | 1          | 3839        |
| GGGATGC,MIR-324-5P                                         | 48   | 0.507847 | 1.663359 | 0.002088  | 0.595669  | 0.91       | 2537        |
| AACATTC,MIR-409-3P                                         | 133  | 0.392304 | 1.644786 | 0.002092  | 0.465639  | 0.928      | 2625        |
| V\$NFMUE1_Q6                                               | 201  | 0.336825 | 1.602082 | 0.003914  | 0.390644  | 0.972      | 4044        |
| AGGTGCA,MIR-500                                            | 95   | 0.46492  | 1.787601 | 0.003968  | 0.814696  | 0.542      | 3138        |
| HSA00563_GLYCOSYLPHOSPHATIDYL INOSITOL_ANCHOR_BIOSYNTHESIS | 21   | 0.548717 | 1.68209  | 0.003992  | 0.584356  | 0.877      | 4221        |
| GTTTGT,MIR-495                                             | 234  | 0.363304 | 1.547093 | 0.004115  | 0.349654  | 0.999      | 5208        |
| V\$NFY_Q6_01                                               | 219  | 0.276807 | 1.429326 | 0.004444  | 0.39202   | 1          | 3504        |
| ST_DICTYOSTELIUM_DISCOIDEUM_CAMP_CHEMOTAXIS_PATHWAY        | 31   | 0.484055 | 1.562924 | 0.005736  | 0.382973  | 0.996      | 3231        |
| KCCGNSWTTT_UNKNOWN                                         | 92   | 0.422236 | 1.736122 | 0.00578   | 0.704391  | 0.727      | 3807        |
| GTATGAT,MIR-154,MIR-487                                    | 62   | 0.479539 | 1.734639 | 0.005964  | 0.610813  | 0.734      | 4452        |
| V\$PAX5_02                                                 | 15   | 0.632917 | 1.656221 | 0.005988  | 0.522398  | 0.921      | 2926        |
| AAGCAAT,MIR-137                                            | 203  | 0.370809 | 1.567534 | 0.006098  | 0.385252  | 0.995      | 3010        |
| ST_WNT_CA2_CYCLIC_GMP_PATHWAY                              | 19   | 0.572863 | 1.720111 | 0.00616   | 0.544048  | 0.764      | 3231        |
| CMV-UV_HCMV_6HRS_DN                                        | 102  | 0.334174 | 1.518252 | 0.006316  | 0.327895  | 1          | 3781        |
| GTATTAT,MIR-369-3P                                         | 199  | 0.390514 | 1.6264   | 0.007952  | 0.394448  | 0.945      | 3587        |
| CTGTTAC,MIR-194                                            | 98   | 0.420709 | 1.662515 | 0.008081  | 0.524477  | 0.911      | 3098        |
| ACACTGG,MIR-199A,MIR-199B                                  | 151  | 0.393323 | 1.629722 | 0.008097  | 0.411399  | 0.943      | 4060        |
| AAAGGGA,MIR-204,MIR-211                                    | 207  | 0.399147 | 1.640456 | 0.00818   | 0.441223  | 0.933      | 2307        |
| GCTGAGT,MIR-512-5P                                         | 50   | 0.379575 | 1.555463 | 0.008316  | 0.338814  | 0.998      | 3578        |
| YKACATTT_UNKNOWN                                           | 244  | 0.275524 | 1.367366 | 0.008565  | 0.420582  | 1          | 3358        |
| TGGTGCT,MIR-29A,MIR-29B,MIR-29C                            | 485  | 0.323705 | 1.523993 | 0.008584  | 0.339233  | 1          | 3307        |
| V\$IRF1_Q6                                                 | 223  | 0.265861 | 1.328382 | 0.008639  | 0.452129  | 1          | 3677        |
| V\$MYC_MAX_02                                              | 231  | 0.29708  | 1.37937  | 0.008715  | 0.404388  | 1          | 3903        |
| ACAWNRNSRCGG_UNKNOWN                                       | 56   | 0.445959 | 1.649523 | 0.009709  | 0.470336  | 0.925      | 4366        |
| V\$SP1_Q4_01                                               | 204  | 0.262791 | 1.372438 | 0.009823  | 0.412572  | 1          | 2389        |

**Supplemental Table 5.** Gene sets enriched after EBV infection, for all samples. Gene sets are listed first by FDR Q value <0.25, then by nominal P value. Gene sets with a nominal P value <0.01 are included.

| GENE SET NAME                          | SIZE | NES      | NOM p-val | FDR q-val | FWER p-val | RANK AT MAX |
|----------------------------------------|------|----------|-----------|-----------|------------|-------------|
| COLLER_MYC_UP                          | 20   | 2.061405 | <0.001    | 0.012466  | 0.019      | 1458        |
| MYC_TARGETS                            | 41   | 2.10619  | <0.001    | 0.014556  | 0.01       | 2567        |
| ADIP_VS_FIBRO_UP                       | 34   | 1.939168 | <0.001    | 0.01639   | 0.135      | 3406        |
| PENG_RAPAMYCIN_DN                      | 189  | 1.941526 | <0.001    | 0.017186  | 0.132      | 2262        |
| CANCER_UNDIFFERENTIATED_META_UP        | 67   | 1.930825 | <0.001    | 0.017772  | 0.161      | 3498        |
| HDACI_COLON_CLUSTERS5                  | 23   | 1.966754 | 0.001992  | 0.018121  | 0.094      | 1867        |
| PENG_Glutamine_DN                      | 254  | 1.977151 | <0.001    | 0.018152  | 0.081      | 4308        |
| ZELLER_MYC_UP                          | 24   | 1.941613 | <0.001    | 0.018414  | 0.132      | 2567        |
| DER_IFNG_UP                            | 61   | 1.924572 | 0.001919  | 0.018504  | 0.172      | 3705        |
| STRESS_TPA_SPECIFIC_UP                 | 42   | 2.063957 | <0.001    | 0.018698  | 0.019      | 2070        |
| SCHUMACHER_MYC_UP                      | 52   | 1.943548 | <0.001    | 0.018766  | 0.126      | 1820        |
| TENEDINI_MEGAKARYOCYTIC_GENES          | 54   | 1.956904 | <0.001    | 0.018924  | 0.105      | 1883        |
| GENOTOXINS_ALL_4HRS_REG                | 24   | 1.979833 | <0.001    | 0.019587  | 0.077      | 1132        |
| CMV_ALL_UP                             | 92   | 1.946134 | <0.001    | 0.019663  | 0.119      | 1768        |
| IFNALPHA_NL_UP                         | 27   | 1.980039 | <0.001    | 0.022029  | 0.076      | 1646        |
| SHEPARD_CRASH_AND_BURN_MUT_VS_WT_UP    | 157  | 1.905434 | <0.001    | 0.023324  | 0.209      | 3314        |
| PENG_LEUCINE_DN                        | 140  | 1.981576 | <0.001    | 0.025275  | 0.074      | 3054        |
| HDACI_COLON_SUL_UP                     | 123  | 1.596451 | <0.001    | 0.111061  | 0.986      | 5018        |
| MYC_ONCOGENIC_SIGNATURE                | 183  | 1.722319 | <0.001    | 0.0681    | 0.815      | 3024        |
| FERNANDEZ_MYC_TARGETS                  | 170  | 1.709666 | <0.001    | 0.068374  | 0.851      | 3696        |
| LI_FETAL_VS_WT_KIDNEY_DN               | 151  | 1.70729  | <0.001    | 0.067493  | 0.855      | 2179        |
| ET743_SARCOMA_DN                       | 255  | 1.737493 | <0.001    | 0.062753  | 0.78       | 2430        |
| ET743_SARCOMA_72HRS_DN                 | 213  | 1.786378 | <0.001    | 0.05263   | 0.613      | 3135        |
| FSH_OVARY_MCV152_UP                    | 57   | 1.784702 | <0.001    | 0.051037  | 0.617      | 1865        |
| TARTE_PLASMA_BLASTIC                   | 289  | 1.988238 | <0.001    | 0.027665  | 0.066      | 3303        |
| FLECHNER_KIDNEY_TRANSPLANT_WELL_PBL_DN | 41   | 1.805854 | <0.001    | 0.048858  | 0.526      | 1876        |
| METHOTREXATE_PROBCELL_UP               | 18   | 1.762165 | <0.001    | 0.056202  | 0.704      | 2180        |
| HSA00251_Glutamate_Metabolism          | 29   | 1.852667 | <0.001    | 0.034607  | 0.372      | 2497        |
| CMV_24HRS_UP                           | 71   | 1.841986 | <0.001    | 0.037211  | 0.403      | 1768        |
| ZHAN_MMPC_PC                           | 23   | 1.817264 | <0.001    | 0.049328  | 0.489      | 1033        |
| CELLCYCLEPATHWAY                       | 23   | 1.877971 | <0.001    | 0.032479  | 0.273      | 1520        |
| HBX_HEP_UP                             | 18   | 1.876098 | <0.001    | 0.03158   | 0.277      | 870         |
| ZMPSTE24_KO_UP                         | 32   | 1.795409 | <0.001    | 0.051946  | 0.576      | 2689        |
| GENOTOXINS_ALL_24HRS_REG               | 27   | 1.996537 | <0.001    | 0.030231  | 0.062      | 1183        |
| HBX_HCC_UP                             | 15   | 1.859713 | <0.001    | 0.035531  | 0.336      | 1883        |
| UV-CMV_UNIQUE_HCMV_6HRS_UP             | 100  | 1.674703 | 0.001818  | 0.078753  | 0.905      | 3768        |
| CMV-UV_HCMV_6HRS_UP                    | 117  | 1.748971 | 0.001828  | 0.061469  | 0.749      | 3308        |
| TARTE_PC                               | 72   | 1.717831 | 0.001845  | 0.06686   | 0.83       | 2262        |
| LU_IL4BCELL                            | 68   | 1.754807 | 0.001848  | 0.060765  | 0.728      | 3919        |

|                                                        |     |          |          |          |       |      |
|--------------------------------------------------------|-----|----------|----------|----------|-------|------|
| BYSTRYKH_HSC_BRAIN_TRANS_GLOC<br>US                    | 155 | 1.534042 | 0.001852 | 0.154286 | 0.996 | 2572 |
| CELL_CYCLE_ARREST                                      | 31  | 1.707601 | 0.001866 | 0.068129 | 0.855 | 3104 |
| BRENTANI_DEATH                                         | 71  | 1.679511 | 0.001873 | 0.078632 | 0.896 | 2244 |
| UEDA_MOUSE_SCN                                         | 81  | 1.848583 | 0.001883 | 0.03583  | 0.384 | 2756 |
| PENG_LEUCINE_UP                                        | 105 | 1.777879 | 0.001887 | 0.052308 | 0.646 | 3002 |
| ESR_FIBROBLAST_DN                                      | 17  | 1.772798 | 0.00189  | 0.05361  | 0.662 | 1108 |
| YU_CMYC_UP                                             | 29  | 1.816237 | 0.001894 | 0.048443 | 0.491 | 3124 |
| HEARTFAILURE_VENTRICLE_DN                              | 66  | 1.764685 | 0.001901 | 0.056681 | 0.695 | 1323 |
| IFN_GAMMA_UP                                           | 38  | 1.866335 | 0.001901 | 0.033704 | 0.313 | 3705 |
| BLEO_MOUSE_LYMPH_LOW_24HRS_<br>DN                      | 27  | 1.854611 | 0.001901 | 0.035767 | 0.356 | 1063 |
| OLDAGE_DN                                              | 47  | 1.771335 | 0.001919 | 0.053302 | 0.671 | 4890 |
| BRCA_BRCA1_POS                                         | 101 | 1.720164 | 0.001931 | 0.067792 | 0.821 | 3192 |
| APOPTOSIS_KEGG                                         | 48  | 1.738276 | 0.001938 | 0.063394 | 0.779 | 2955 |
| IFNALPHA_NL_HCC_UP                                     | 18  | 1.85651  | 0.001961 | 0.036304 | 0.349 | 1398 |
| CELL_CYCLE                                             | 78  | 1.625128 | 0.001976 | 0.100241 | 0.966 | 1520 |
| AS3_FIBRO_C4                                           | 18  | 1.802538 | 0.003656 | 0.049855 | 0.543 | 2863 |
| STTCRNTT_V\$IRF_Q6                                     | 162 | 1.692885 | 0.003704 | 0.075508 | 0.877 | 3010 |
| ET743_SARCOMA_48HRS_DN                                 | 177 | 1.692807 | 0.003711 | 0.074698 | 0.877 | 3659 |
| FERRARI_4HPR_UP                                        | 22  | 1.744434 | 0.003724 | 0.061245 | 0.758 | 605  |
| IRS1_KO_ADIP_UP                                        | 87  | 1.491775 | 0.003731 | 0.186374 | 0.999 | 4781 |
| HSP27PATHWAY                                           | 15  | 1.774761 | 0.003738 | 0.053442 | 0.656 | 913  |
| HDACI_COLON_CLUSTER4                                   | 15  | 1.72163  | 0.003745 | 0.067528 | 0.816 | 593  |
| IDX_TSA_UP_CLUSTER1                                    | 24  | 1.852964 | 0.003745 | 0.035733 | 0.369 | 3658 |
| SANA_IFNG_ENDOTHELIAL_UP                               | 71  | 1.793802 | 0.003774 | 0.051643 | 0.58  | 3160 |
| KRETZSCHMAR_IL6_DIFF                                   | 135 | 1.815595 | 0.003817 | 0.045867 | 0.493 | 2870 |
| BROCKE_IL6                                             | 135 | 1.815595 | 0.003817 | 0.047257 | 0.493 | 2870 |
| CMV_8HRS_UP                                            | 32  | 1.87101  | 0.003861 | 0.032263 | 0.295 | 882  |
| HESS_HOXAANMEIS1_UP                                    | 59  | 1.60366  | 0.003876 | 0.107399 | 0.981 | 3397 |
| HESS_HOXAANMEIS1_DN                                    | 59  | 1.60366  | 0.003876 | 0.10814  | 0.981 | 3397 |
| GUO_HEX_DN                                             | 57  | 1.578358 | 0.003945 | 0.122771 | 0.988 | 3347 |
| AGED_MOUSE_CORTEX_UP                                   | 30  | 1.730665 | 0.003945 | 0.066412 | 0.798 | 3057 |
| MUNSHI_MM_VS_PCS_UP                                    | 73  | 1.654787 | 0.003953 | 0.08498  | 0.937 | 2360 |
| PDGF_ES_UP                                             | 17  | 1.806553 | 0.003992 | 0.049815 | 0.523 | 2891 |
| HDACI_COLON_BUT_DN                                     | 242 | 1.481133 | 0.005587 | 0.194265 | 0.999 | 5068 |
| CIRCADIAN_EXERCISE                                     | 41  | 1.743573 | 0.005607 | 0.060794 | 0.76  | 5258 |
| AMINOACYL_TRNA_BIOSYNTHESIS                            | 22  | 1.783188 | 0.005792 | 0.050736 | 0.625 | 1670 |
| HDACI_COLON_CUR48HRS_UP                                | 60  | 1.796235 | 0.005825 | 0.052806 | 0.571 | 2140 |
| CANCERDRUGS_PROBCELL_UP                                | 20  | 1.745479 | 0.005906 | 0.061694 | 0.756 | 2180 |
| UVC_HIGH_ALL_UP                                        | 18  | 1.715446 | 0.005929 | 0.066985 | 0.832 | 1425 |
| HSA04130_SNARE_INTERACTIONS_IN<br>_VESICULAR_TRANSPORT | 28  | 1.74619  | 0.005952 | 0.062174 | 0.754 | 1895 |
| TRANSLATION_FACTORS                                    | 45  | 1.778666 | 0.005964 | 0.052768 | 0.644 | 4076 |
| MUNSHI_MM_UP                                           | 64  | 1.628538 | 0.006    | 0.097769 | 0.965 | 2858 |
| 4NQO_UNIQUE_FIBRO_UP                                   | 22  | 1.785094 | 0.006    | 0.052036 | 0.617 | 1714 |
| TAKEDA_NUP8_HOXA9_10D_UP                               | 173 | 1.576563 | 0.007156 | 0.123916 | 0.989 | 4287 |
| VHL_NORMAL_UP                                          | 407 | 1.40451  | 0.007246 | 0.261186 | 1     | 3079 |
| HDACI_COLON_CUR_UP                                     | 105 | 1.729479 | 0.007394 | 0.066299 | 0.799 | 5028 |

|                                             |     |          |          |          |       |      |
|---------------------------------------------|-----|----------|----------|----------|-------|------|
| BREASTCA_THREE_CLASSES                      | 40  | 1.674891 | 0.007435 | 0.079397 | 0.904 | 2603 |
| TGANNYRGCA_V\$TCF11MAFG_01                  | 261 | 1.359197 | 0.007519 | 0.299275 | 1     | 3437 |
| BRENTANI_IMMUNE_FUNCTION                    | 53  | 1.664875 | 0.007576 | 0.081998 | 0.921 | 3008 |
| DAC_BLADDER_UP                              | 27  | 1.749521 | 0.00759  | 0.062211 | 0.748 | 3768 |
| ZHAN_MMPC_EARLYVS                           | 46  | 1.657075 | 0.007634 | 0.084347 | 0.932 | 602  |
| HSA00970_AMINOACYL_TRNA_BIOSY<br>NTHESIS    | 31  | 1.789253 | 0.007648 | 0.052331 | 0.603 | 3494 |
| GILDEA_BLADDER_UP                           | 29  | 1.658191 | 0.007692 | 0.084183 | 0.931 | 1398 |
| BREASTCA_TWO_CLASSES                        | 132 | 1.624543 | 0.007722 | 0.100026 | 0.966 | 5162 |
| GLYCINE_SERINE_AND_THREONINE_<br>METABOLISM | 35  | 1.643408 | 0.008048 | 0.089887 | 0.949 | 3865 |
| NADLER_OBESITY_DN                           | 36  | 1.719923 | 0.008147 | 0.066958 | 0.821 | 3082 |
| HDACI_COLON_SUL24HRS_UP                     | 62  | 1.648374 | 0.009174 | 0.088971 | 0.945 | 2034 |
| SERUM_FIBROBLAST_CELLCYCLE                  | 124 | 1.525365 | 0.009259 | 0.159301 | 0.996 | 4414 |
| ZHAN_MM_MOLECULAR_CLASSI_UP                 | 56  | 1.679381 | 0.009328 | 0.077915 | 0.896 | 3363 |
| ADIP_VS_PREADIP_UP                          | 35  | 1.624362 | 0.009381 | 0.098654 | 0.966 | 2732 |
| APOPTOSIS_GENMAPP                           | 40  | 1.651681 | 0.009416 | 0.086756 | 0.939 | 2814 |
| APOPTOSIS                                   | 65  | 1.764204 | 0.009434 | 0.055965 | 0.698 | 2814 |
| LEE_TCELLS6_UP                              | 24  | 1.645311 | 0.009434 | 0.089795 | 0.948 | 2859 |
| TNFALPHA_4HRS_UP                            | 37  | 1.599594 | 0.009506 | 0.110143 | 0.983 | 4231 |
| HDACI_COLON_BUT48HRS_DN                     | 115 | 1.592986 | 0.009597 | 0.111788 | 0.987 | 2496 |
| BRENTANI_CELL_CYCLE                         | 81  | 1.525288 | 0.009615 | 0.158569 | 0.996 | 2797 |
| UVB_NHEK3_ALL                               | 385 | 1.537201 | 0.009671 | 0.153778 | 0.996 | 3775 |
| UVB_NHEK3_C3                                | 17  | 1.728242 | 0.009728 | 0.065035 | 0.803 | 3338 |
| LEE_TCELLS1_UP                              | 169 | 1.542012 | 0.009862 | 0.150325 | 0.996 | 4535 |
| LEE_TCELLS8_UP                              | 169 | 1.542012 | 0.009862 | 0.15117  | 0.996 | 4535 |
| LEE_TCELLS10_UP                             | 169 | 1.542012 | 0.009862 | 0.152024 | 0.996 | 4535 |
